# Supplementary material for: Geospatial analysis of healthcare and older adult care institutions in Wuhan: a multimethod approach to assessing spatial equity
Source: Frontiers journal article supplement (doi:10.3389/fpubh.2025.1580630), 2025-08-05
Supplement: Table_4.xls [file Table_4.xls]

## Sheet: Sheet1
Serial Number	Administrative Division	Name of Elderly Care Institution	Detailed Address	X	Y
1	Caidian District	Caidian District Social Welfare Institution	No. 218, Caidian Avenue, Caidian Street	114.032	30.5692
2	Caidian District	Caidian District Yuxian Street Rural Welfare Institution	Group 2, Cheling Village, Yuxian Town	113.992	30.5293
3	Caidian District	Caidian District Zhurou Street Rural Welfare Institution	Gaodeng Village, Zhurou Street	113.845	30.4565
4	Caidian District	Caidian District Yongan Street Rural Welfare Institution	Group 8, Yongan Village, Yongan Street	113.948	30.4678
5	Caidian District	Caidian District Suohe Street Rural Welfare Institution	Fuxing Road, Suohe Village, Suohe Town	113.909	30.5332
6	Caidian District	Caidian District Xiaosi Township Rural Welfare Institution	Hongnan Village, Xiaosi Township	113.774	30.3355
7	Caidian District	Caidian District Hongbei Administrative Committee Rural Welfare Institution	Xigan Village, Hongbei	113.863	30.388
8	Caidian District	Hezhong Younian, Caidian District/Hezhong Health Industry(Wuhan)Investment Co., Ltd.	No. 3 Zhiyin Avenue, Daji Street	114.088	30.5211
9	Caidian District	Wuhan Jiuzhenshan Elderly Care Institution	Jiuzhenshan TV Drama Filming Base, Yongan Street	113.93	30.4748
10	Caidian District	Wuhan Qiaoya Yileyuan	No. 8 Tiepu Te, Hanyang Street, Caidian District	114.122	30.5567
11	Caidian District	Zhangwan Community Elderly Care Institution, Caidian District	No. 3 Zhengjie, Zhangwan Community, Zhangwan Street	113.977	30.6564
12	Caidian District	Longwang Community Elderly Care Institution, Caidian District	Longwang Community, Changfu Industrial Demonstration Park, Caidian District	114.063	30.4609
13	Caidian District	Wuhan Youyuan Yikangyuan Elderly Care Service Co., Ltd.	No. 8 Xinyao Yunduo Park Road, Caidian Sub-district, Caidian District	114.023	30.5917
14	Dongxihu District	Municipal Second Social Welfare Institution	No. 1 Tianmafeng North Road, Longquan Street, Donghu High-tech Zone, Wuhan	114.519	30.4226
15	Dongxihu District	Central Welfare Institution, Dongxihu District	No. 11 Xinjian Village, Second Brigade, Zoumalin Street, Dongxihu District	114.05	30.6647
16	Dongxihu District	Fozuling Welfare Institution, Donghu High-tech Development Zone	Zone C, Fozuling Community, Donghu High-tech Development Zone	114.452	30.4507
17	Dongxihu District	Zoumalin Welfare Institution, Dongxihu District	No. 11 Xinjian Village, Second Brigade, Zoumalin Street, Dongxihu District	114.049	30.6653
18	Dongxihu District	Hebaohu Elderly Care Institution, Dongxihu District	No. 2000 Dongxihu Avenue, Hebao Lake Brigade, Xin’andu Office	113.995	30.726
19	Dongxihu District	Mengjia Community Horticultural Elderly Care Institution, Dongxihu District	No. 344 Linkonggang Avenue, Wujiashan Street (Office)	114.143	30.639
20	Dongxihu District	Yibai Elderly Care Institution, Guantangjiao Community, Dongxihu District	1st Floor, Building 5, Xiushui Jiayuan Liyuan, No. 51 Pizhuan Road, Jinghe Street, Dongxihu District	114.146	30.6537
21	Dongxihu District	Changqing Elderly Care Institution, First Community, Dongxihu District	No. 8 Xuefu Side Road, Changqing Garden Management Committee	114.242	30.6448
22	Dongxihu District	Hehuayuan Elderly Care Institution, Mengjia Community, Dongxihu District	North Side of Building 18, Hehua Garden Community, Wujiashan Street (Office)	114.148	30.6375
23	Dongxihu District	Jiangjun Road Community Elderly Care Institution, Dongxihu District	Jiangjun Road Subdistrict(Subdistrict Office)Phase II Resettlement Building1Ground floor storefront of the building	114.259	30.6593
24	Hannan District	Dunyang Welfare Institution, Wuhan Economic and Technological Development Zone	No. 392 Checheng Avenue, Wuhan Economic and Technological Development Zone	114.149	30.4974
25	Hannan District	Junshan Welfare Institution, Wuhan Economic and Technological Development Zone	No. 325 Huangling Main Street, Wuhan Economic and Technological Development Zone	114.091	30.4179
26	Hannan District	Dengnan Subdistrict Rural Welfare Institution, Hannan District	No. 214 Zhenxing Street, Dengnan Subdistrict, Hannan District	113.988	30.3124
27	Hannan District	Yifu Community Elderly Care Institution, Wuhan Economic and Technological Development Zone	Jixiang International, Chuangye Road, Wuhan Economic and Technological Development ZoneBFirst Floor	114.159	30.4876
28	Hannan District	Yide Community Elderly Care Institution, Wuhan Economic Development Zone	Building 1 and 2, Chaohai Apartment, No. 2 Boxue Road, Wuhan Economic and Technological Development Zone	114.163	30.5295
29	Hannan District	Wuhan Economic Development Zone(Hannan District)Zhongyi, District(Wuhan)Elderly Care Limited Liability Company	Comprehensive Building 2, Zhoujiazui, Hongshan Village, Dunyang Street, Wuhan Economic and Technological Development Zone	114.081	30.4671
30	Hanyang District	Hanyang District Social Welfare Institution	No. 28 Liyuzhou Road, Hanyang District	114.242	30.5303
31	Hanyang District	Hemu Kang Elderly Care Institution Co., Ltd., Hanyang District	Liyuzhou Road, Jiangdi Street, Hanyang District28No.	114.242	30.5305
32	Hanyang District	China Merchants Guanyi Home Elderly Care Institution, Hanyang District	Building 22, Weihuxuan, No. 288 Jiangcheng Avenue, Hanyang District	114.233	30.5388
33	Hanyang District	Changshou Elderly Care Institution, Wuchunli Community, Hanyang District	No. Te1, Nanjingyuan Community, Qilin Road, Hanyang District	114.232	30.554
34	Hanyang District	Xingfu Ankang Elderly Care Institution, Wuqinli Community, Hanyang District	No. 13, Wuli Er Village, Hanyang District	114.258	30.5586
35	Hanyang District	Elderly Care Institution, Nancheng Community, Hanyang District	No. 50 Qingchuan Alley, Qunjian Road, Hanyang District	114.281	30.553
36	Hanyang District	Nancheng Community, Jianqiao Street, Hanyang District(Aixin)Elderly Care Institution	No. 16 Mianhua Street, Hanyang District	114.281	30.553
37	Hanyang District	Wuhan Nanshan Health Care Co., Ltd. Yuehu Hui Elderly Care Institution Branch	No. 182 Qintai Avenue, Hanyang District	114.253	30.5646
38	Hanyang District	Changqing Elderly Care Institution, Wulidun Street, Hanyang District	H1-S2, Area A, Chengzhong Garden, Hanqiao Road, Hanyang District	114.259	30.5584
39	Hanyang District	Kangtai Elderly Care Institution, Qiaoji Community, Yingwu Street, Hanyang District	No. 63, Qiaoji Xincun, Hanyang District	114.265	30.5336
40	Hanyang District	Xiyanghong Elderly Apartment, Zhoutou Street, Hanyang District	No. 142 Jiangang Zhoutou Second Road, Hanyang District	114.26	30.5314
41	Hanyang District	Elderly Care Institution, Qili Yicun Community, Hanyang District	5th Floor, No. 116, Qili Yicun, Hanyang District	114.231	30.5614
42	Hanyang District	Elderly Care Institution, Zhiyin Xiyuan Community, Erqiao Street, Hanyang District	No. 58, Zhiyin Xicun, Hanyang District	114.215	30.5729
43	Hanyang District	Elderly Care Institution, Qiaoxi Community, Erqiao Street, Hanyang District	No. 12-14, Zhiyin Road, Hanyang District	114.218	30.5744
44	Hanyang District	Elderly Care Institution, Zhiyin Dongyuan Community, Hanyang District	No. 46, Zhiyin Dongcun, Jianghan Second Bridge Street, Hanyang District	114.221	30.5738
45	Hanyang District	Hansha Community Elderly Care Institution, Hanyang District	No. 35 Longyang Avenue, Hanyang District	114.215	30.566
46	Hanyang District	Huimin Garden Community, Yongfeng Subdistrict, Hanyang District(Yinghong)Elderly Care Institution	No. 21, Building 35, Phase III, Huimin Garden, Hanyang District	114.178	30.5916
47	Hanyang District	Hancheng Community, Longyang Subdistrict, Hanyang District(Fuxing)Elderly Care Institution	Building 6, No. 20 Longzhu Road, 2nd-3rd Floor, Hanyang District	114.21	30.5444
48	Hanyang District	Hancheng Community, Longyang Subdistrict, Hanyang District(Qingchuan)Elderly Care Institution	Building 1, Hancheng Garden, Shengguandu, Longyang Avenue, Hanyang District	114.206	30.545
49	Hanyang District	Yian Elderly Care Institution, Taojialing Community, Hanyang District	No. 8 Longyang Avenue, Hanyang District	114.207	30.5536
50	Hanyang District	Yiju Elderly Care Institution, Liaoyuan Community, Yongfeng Subdistrict, Hanyang District	Building 1-3, Xinrui · Xiaocheng Story, Liaoyuan Community, Hanyang District	114.207	30.5776
51	Hanyang District	Meigui Xiyuan Community Kangle Elderly Care Institution, Hanyang District	No. 14, Building 1, Southwest H District, Second Bridge, Hanyang District	114.214	30.5701
52	Hanyang District	Yongfeng Street Comprehensive Elderly Care Service Center, Hanyang District	No. Te3, Yongantang, Liaoyuan Community, Hanyang District	114.202	30.5731
53	Hanyang District	Zhoutou Street Comprehensive Elderly Care Service Center, Hanyang District	No. 311, Zhoutou Yicun, Hanyang District	114.261	30.5329
54	Hongshan District	Hongshan District Social Welfare Institution	No. 47, Fengsheng Road, Zhangjiawan Street, Hongshan District	114.3	30.4845
55	Hongshan District	Shizishan Street Comprehensive Elderly Care Service Center, Hongshan District	No. 41, Nanhu Avenue, Hongshan District	114.334	30.4878
56	Hongshan District	Hubei Medical and Elderly Rehabilitation Center	No. 120, Zhuodaquan South Road, Hongshan District	114.372	30.5033
57	Hongshan District	Kangheyuan Elderly Care Center, Hongshan District	Floors 4-10, Reipu Investment Building, No. 2, Shipailing East 1st Road, Hongshan District	114.349	30.5254
58	Hongshan District	Futai Elderly Care Institution, Hongshan District	No. 12, 24 Fuxi, Zhongbei East Road, Hongshan District	114.373	30.5852
59	Hongshan District	Yixinyuan Elderly Care Institution, Hongshan District	No. Te1, Nanhu Xinqianjia Street, Hongshan Township, Hongshan District	114.319	30.5025
60	Hongshan District	Tonghui Community Elderly Care Institution, Hongshan District	Building 12, Junwei Garden Community, Hongshan District	114.319	30.4993
61	Hongshan District	Fangtai Elderly Care Institution, Beigang Community, Hongshan District	No. 362, Dingziqiao South Road, Hongshan District	114.332	30.5151
62	Hongshan District	Qifa Community Elderly Care Institution, Hongshan District	No. 124, Guanshan First Road, Hongshan District	114.418	30.5119
63	Hongshan District	Chengshi Huayuan Community Elderly Care Institution, Hongshan District	Shop No. 508-1, Qingling City Garden, Hongshan District	114.281	30.4754
64	Hongshan District	Zhuodaoquan Community Elderly Care Institution, Hongshan District	No. 538, Xiongchu Avenue, Hongshan District	114.382	30.5106
65	Hongshan District	Kangde Elderly Care Institution, Hongshan District	Building B, 3rd-5th Floor, No. 285 Baisha Zhou Avenue (Weilong Grand Hotel), Hongshan District	114.302	30.5105
66	Hongshan District	Dongshanting Community Elderly Care Institution, Hongshan District	No. 269, Huanle Avenue, Liyuan Street, Dongting Xinjia Yuan, Building 5, Hongshan District	114.378	30.5947
67	Hongshan District	Poly Xinyu Kangxin Elderly Care Institution, Hongshan District	No. 16, Yezhi Lake West Road, Hongshan District	114.332	30.4834
68	Hongshan District	Kangya Elderly Care Institution, Hongshan District	Building 21, 1st-15th Floor, Dongfang Yayuan Phase II, Heping Street, Hongshan District	114.404	30.6194
69	Hongshan District	Guannan Community Elderly Care Institution, Guandong Street, Donghu High-tech Development Zone	Building 10, Guannan Industrial Park, Donghu High-tech Development Zone	114.442	30.483
70	Hongshan District	Taikang Home Chuyuan(Wuhan)Elderly Care Services Co., Ltd.	No. 66 Yanxihu Road, Donghu New Technology Development Zone	114.499	30.5724
71	Hongshan District	Xianfeng Community Home Elderly Care Institution, Donghu Scenic Area	Pengjialing, Luoyan Road, Donghu Ecological Tourism Scenic Area	114.438	30.5903
72	Hongshan District	Burui Elderly Care Institution, Donghu Scenic Area	Building 28, No. 301, Huanle Avenue, Donghu Ecological Tourism Scenic Area	114.386	30.5979
73	Huangpi District	Huangpi District Yaoji Street Welfare Institution	No. 111, Zhongsheng Street, Yaoji Street	114.387	31.2216
74	Huangpi District	Huangpi District Changxuanling Street Welfare Institution	No. 77, Duanlingwan, Duanling Village, Changling Street	114.361	31.1161
75	Huangpi District	Huangpi District Mulan Township Welfare Institution	No. 2, Lanxiu Road, Ta’ergang Street, Mulan Township	114.469	31.1125
76	Huangpi District	Wangjiahe Subdistrict Welfare Institution, Huangpi District	Dameiqiangwan, Luojiagang Village, Wangjiahe Subdistrict	114.424	30.9722
77	Huangpi District	Caizha Subdistrict Welfare Institution, Huangpi District	Zhourenwan Village, Caizha Subdistrict	114.528	30.956
78	Huangpi District	Liuzhi Subdistrict Welfare Institution, Huangpi District	Tonglian Village, Liuzhi Subdistrict	114.535	30.8919
79	Huangpi District	Gantang Branch, Liuzhi Subdistrict Welfare Institution, Huangpi District	Gantang Road, Liuzhi Subdistrict, Huangpi District	114.587	30.8871
80	Huangpi District	Sanliqiao Subdistrict Welfare Institution, Huangpi District	No. 16, Yinhu Avenue, Sanli Subdistrict	114.419	30.7955
81	Huangpi District	Wuhu Subdistrict Welfare Institution, Huangpi District	No. 1, Zhangwan Team, Wuhu Farm	114.514	30.7084
82	Huangpi District	Tianhe Subdistrict Welfare Institution, Huangpi District	No. 238, Helu Street, Tianhe Subdistrict	114.226	30.8096
83	Huangpi District	Huangpi District Hengdian Subdistrict Welfare Institution	Hongyan Village, Hengdian Subdistrict	114.319	30.8037
84	Huangpi District	Huangpi District Qijiawan Subdistrict Welfare Institution	Dacao Village, Qijiawan Subdistrict	114.266	30.8596
85	Huangpi District	Huangpi District Liji Subdistrict Welfare Institution	Xinmiao Village, Liji Subdistrict	114.241	30.9999
86	Huangpi District	Huangpi District Luohan Temple Subdistrict Welfare Institution	No. 33, Longxing Street, Luohan Temple Subdistrict	114.319	30.9603
87	Huangpi District	Huangpi District Development Zone Welfare Institution	Liugutang Village, Panlongcheng Economic Development Zone	114.256	30.7202
88	Huangpi District	Ganlu Elderly Apartment, Shuangfeng Community, Huangpi District	Qingfeng Village, Qianchuan Subdistrict, Huangpi District	114.391	30.9302
89	Huangpi District	Shouxingyuan Yiyang Elderly Care Institution, Huangpi District	Fengxiangjui Village, Shekou Subdistrict, Huangpi District	114.314	30.7434
90	Huangpi District	Shizishan Qingshuiwan Shanzhuang Elderly Apartment, Huangpi District	Shizishan Village, Changxuanling Subdistrict, Huangpi District	114.354	31.1065
91	Huangpi District	Yunwushan Elderly Apartment, Huangpi District	Pao Tong Community, Liji Town, Huangpi District	114.214	31.0698
92	Huangpi District	Minfeng Kangle Elderly Care Institution, Liji Subdistrict, Huangpi District	Zhoujiawan, Minfeng Village, Liji Subdistrict	114.244	30.9779
93	Huangpi District	Hongye Rehabilitation Elderly Care Institution, Huangpi District	Water Tower, Shisi Avenue, Qunlian Village, Qianchuan Subdistrict, Huangpi District	114.344	30.8796
94	Huangpi District	Mulan Changling Elderly Apartment, Huangpi District	No. 77, Duanling Village, Changxuanling Town, Huangpi District	114.298	30.5845
95	Huangpi District	Chunxiao Elderly Care Apartment, Huangpi District	Fangxiawan, Lijiaji Subdistrict, Huangpi District	114.208	30.9778
96	Huangpi District	Xiyanghong Elderly Care Institution, Jinxiuxu Community, Huangpi District	No. 219, Zhujiashan, Dingyuan Village, Qianchuan Street, Huangpi District	114.385	30.8973
97	Huangpi District	Jianing Elderly Care Institution, Jiahai Community, Huangpi District	Jianing Jiahai Community, Panlongcheng Economic and Technological Development Zone	114.248	30.7361
98	Huangpi District	Laolaile Elderly Apartment, Huangpi District	Baitang Village, Luohan Subdistrict, Huangpi District	114.348	30.9962
99	Huangpi District	Chungui Elderly Apartment, Huangpi District	Tianpu Village, Luohan Temple Subdistrict, Huangpi District	114.299	30.8903
100	Huangpi District	Wangjiahe Wannianqing Elderly Care Apartment, Huangpi District	Tangbaoshe, Hongjiachong, Changyan Street, Wangjiahe, Huangpi District	114.439	31.0156
101	Huangpi District	Springtime Elderly Care Apartment, Huangpi District	Duanjiagangwan, Qunhe Village, Liuzhi Street, Huangpi District	114.509	30.9121
102	Huangpi District	Chunyi Elderly Care Institution, Huangpi District	Former Qunli Primary School, Zhenjun Village, Qianchuan Subdistrict, Huangpi District	114.311	30.8847
103	Huangpi District	Yile Elderly Apartment, Panlongcheng, Huangpi District	Chutian Avenue (Special), Panlongcheng Economic Development Zone, Huangpi District1No. Zhuoer Advantage Enterprise Headquarters Base21Building3-6Floor	114.305	30.7063
104	Huangpi District	Wuhan Youfu Jiayuan Yiyang Apartment, Huangpi District	No. 66, Shuangfeng Avenue, Qianchuan Street	114.4	30.8754
105	Huangpi District	Qinhe Elderly Care Institution, Huangpi District	No. 19 and No. 21, Qijiawan, Longxing Village, Luohansi Street, Huangpi District	114.332	31.0296
106	Huangpi District	Ankang Elderly Care Institution, Sanliqiao Subdistrict, Huangpi District	No. 28, Wangduwan, Jiupingsi Village, Sanliqiao Street, Huangpi District	114.433	30.7847
107	Huangpi District	Tongshoutang Nursing Home, Huangpi District	No. 1, 1st Floor, Building C2, Qisheng Industrial Park, Wuhu Street, Huangpi District	114.415	30.7243
108	Jiang’an District	Social Welfare Institution, Jiang’an District	No. 203 Xingsheng Road, Chenjiaji Subdistrict, Jiang’an District	114.376	30.6943
109	Jiang’an District	Dannnan Community Elderly Care Institution, Jiang’an District	No. 145, Handi Road, Jiang’an District	114.34	30.65
110	Jiang’an District	Tieman Community Elderly Care Institution, Jiang’an District	No. 2237, Jiefang Avenue	114.326	30.6327
111	Jiang’an District	Huimin Elderly Care Institution, Jiang’an District	Building 5, 1st Floor, Huiminju, Houhu Street, Jiang’an District	114.319	30.6545
112	Jiang’an District	Jiangzhong Community Elderly Care Institution, Jiang’an District	No. 12, Jiang’an Road, Jiang’an District	114.351	30.6669
113	Jiang’an District	Sanyang Community Elderly Care Institution, Jiang’an District	No. 107, Jiangdongting Street, Jiang’an District	114.308	30.5951
114	Jiang’an District	Xingfu Community Elderly Care Institution, Jiang’an District	Shengcheng Sunshine Li Jing, Xingfu Second Road, Jiang’an District	114.321	30.6647
115	Jiang’an District	Xinma Community, Jiang’an District(Teacher Dong)Elderly Care Institution	No. 3-3-1, Ark Garden, Jiang’an District	114.339	30.6602
116	Jiang’an District	Hangwu Community Elderly Care Institution, Jiang’an District	No. 38, Erqi Heng Road, Jiang’an District	114.326	30.6398
117	Jiang’an District	Jianshe Xincun Community Elderly Care Institution, Jiang’an District	No. 426, Liancheng Xincun, Jiang’an District	114.326	30.648
118	Jiang’an District	Qiuxin Community Elderly Care Institution, Jiang’an District	Building 11, Unit 3, Qiu Xin Community, Jiang’an District	114.302	30.599
119	Jiang’an District	Sanhe Community Elderly Care Institution, Jiang’an District.	Building A, No. 1, Laodong Xincun, Laodong Street, Jiang’an District	114.307	30.6078
120	Jiang’an District	Comprehensive Elderly Care Service Center, Xima Street, Jiang’an District.	No. 15, Gaoxiong Road, Xima Street, Jiang’an District	114.294	30.5993
121	Jiang’an District	Xinrong Community Elderly Care Institution, Jiang’an District.	No. 360, Houhu Avenue, Jiang’an District	114.334	30.6601
122	Jiang’an District	Xiangyuan Community, Jiang’an District.(Youkang.)Elderly Care Institution	No. 167, Xingye Road, Jiang’an District	114.307	30.6474
123	Jiang’an District	Yucai Community Elderly Care Institution, Jiang’an District.	No. 117, Sanyanqiao Fourth Village, Tiancheng Garden	114.287	30.6203
124	Jiang’an District	Changhang Community Elderly Care Institution, Jiang’an District.	No. 158, Sanyanqiao First Village, Jiang’an District	114.291	30.6167
125	Jiang’an District	Mingxin Community Elderly Care Institution, Jiang’an District.	No. 93, Mingxin Street, Huangshi Road, Jiang’an District	114.298	30.5946
126	Jiang’an District	Huizhong Community Elderly Care Institution, Jiang’an District.	No. 47, Huiji Road, Jiang’an District	114.301	30.6198
127	Jiang’an District	Changjiang Mingzhu Community Elderly Care Institution, Jiang’an District.	No. 28, Chenjiaji Avenue, Jiang’an District	114.374	30.6783
128	Jiang’an District	Dongfang Community Elderly Care Institution, Jiang’an District.	Commercial, Second Floor, Building No. 2.1, Houhu Xingye Road, Jiang’an District	114.303	30.6446
129	Jiang’an District	Wuhan Chunxuanmao Elderly Care Services Co., Ltd.	No. 88, Gaoxiong Road, Jiang’an District	114.294	30.6071
130	Jiang’an District	Yuefei Community Elderly Care Institution, Jiang’an District.	No. 21, Huangxing Road, Jiang’an District	114.305	30.5951
131	Jiang’an District	Hongqiao Village Community Elderly Care Institution, Jiang’an District.	Building 8, 2nd Floor, N819/N820 Shops, H4/H5 Plot, Hongqiao Village Reconstruction, Jiang’an District	114.29	30.6297
132	Jiang’an District	Wuhan Runji Elderly Care Institution Co., Ltd.	Reconstruction Commercial Complex, Shiqiao Village, No. 33, Xingye Road, Jiang’an District	114.294	30.6654
133	Jiang’an District	Weisang Community Elderly Care Institution, Jiang’an District	Building C, No. 120, Gongnongbing Road, Jiang’an District	114.318	30.6308
134	Jiang’an District	Yuansheng Elderly Care Institution, Jiang’an District	No. 87, Heinihu, Jiang’an District	114.324	30.6459
135	Jianghan District	Wuhan Social Welfare Institution	No. 198 Fazhan Avenue, Jianghan District, Wuhan	114.267	30.6212
136	Jianghan District	Jianghan District Social Welfare Institution	No. 10 Changteng Street	114.246	30.6151
137	Jianghan District	Chenjiadun Community Elderly Care Institution, Jianghan District	No. 4, Jindun Street, Jianghan District	114.267	30.6233
138	Jianghan District	Changsi Community Elderly Care Institution, Jianghan District	Building 3, 1st Floor, Changqing Siyuan, Yangchahu Community, Changqing Fifth Road	114.261	30.6366
139	Jianghan District	Shumei Elderly Care Institution, Fuhao Community, Jianghan District	No. 15, Beihu Lane	114.272	30.6093
140	Jianghan District	Kangbei Community Elderly Care Institution, Jianghan District	No. 283, Xinhua Road, Beihu Street, Jianghan District	114.277	30.61
141	Jianghan District	Huazhong Community Elderly Care Institution, Jianghan District	No. 13, Jianghan Second Road	114.294	30.5868
142	Jianghan District	Gushaoshu Community Elderly Care Institution, Jianghan District	Building 3, 1st Floor, Yuandingyuan Community, No. 51, Gusao Tree Road	114.265	30.638
143	Jianghan District	Yanma Community Xingguang Elderly Care Institution, Jianghan District	No. 175, Zizhi Street	114.289	30.5862
144	Jianghan District	Hexiangli Community Elderly Care Institution, Jianghan District	No. 22, Changqing First Hospital	114.268	30.6362
145	Jianghan District	Hejiadun Community Elderly Care Institution, Jianghan District	No. 51, Yuyu Li, Changqing Street	114.258	30.6183
146	Jianghan District	Minzu Community Elderly Care Institution, Jianghan District	No. 152, Mingquan Road, Guangyi Tianxia, Building A.C, 2nd Floor	114.296	30.5794
147	Jianghan District	Duowen Community Yihe Elderly Care Institution, Jianghan District	No. 70-80, Minzhu Street	114.288	30.5843
148	Jianghan District	Jiuzhoutong Renshoutang Elderly Care Institution, Jianghan District	No. 198, Fazhan Avenue, Jianghan District	114.267	30.6213
149	Jianghan District	Zhandong Community Elderly Care Institution, Jianghan District	No. Te1, Fazhan Avenue, Jianghan District	114.273	30.6238
150	Jiangxia District	Rural Central Welfare Institution, Jiangxia District	No. 35-1 Wenhua Road, Jiangxia District	114.328	30.3698
151	Jiangxia District	Zhifang Subdistrict Rural Welfare Institution, Jiangxia District	No. 8 Xingfu Lane, Zhifang Subdistrict	114.325	30.3474
152	Jiangxia District	Jinkou Subdistrict Rural Welfare Institution, Jiangxia District	No. 1 Changshan Village, Jinkou Subdistrict	114.195	30.3459
153	Jiangxia District	Wulongquan Subdistrict Rural Welfare Institution, Jiangxia District	No. 9 Mafang Dongwan, Qunjian Village, Wulongquan Subdistrict	114.341	30.2328
154	Jiangxia District	Zhengdian Subdistrict Rural Welfare Institution, Jiangxia District	Duanlingmiao Community, Zhengdian Subdistrict	114.285	30.2731
155	Jiangxia District	Rural Welfare Institution, Fasi Subdistrict, Jiangxia District	No. 69 Tianqi Lane, Fasi Subdistrict	114.17	30.1595
156	Jiangxia District	Rural Welfare Institution, Anshan Subdistrict, Jiangxia District	Maan Village, Anshan Subdistrict	114.28	30.1429
157	Jiangxia District	Rural Welfare Institution, Shanpo Subdistrict, Jiangxia District	No. 39 Fumin Street, Baofu Community, Shanpo Subdistrict	114.428	30.11
158	Jiangxia District	Rural Welfare Institution, Shuan Subdistrict, Jiangxia District	No. 147 Lianghu Road, Shuan Subdistrict	114.514	30.1197
159	Jiangxia District	Rural Welfare Institution, Husi Subdistrict, Jiangxia District	No. 288, Fuqiao Street, Husi Community, Husi Street	114.446	30.021
160	Jiangxia District	Rural Welfare Institution, Daqiao New Area Office, Jiangxia District	Wangjiawan, Dahualing Village, Daqiao New Area	114.317	30.4228
161	Jiangxia District	Qiaoya Kangrui Yileyuan Elderly Care Institution, Jiangxia District	No. 1, Qiaoya, Limiao Village, Wulijie Street, Jiangxia District	114.327	30.3942
162	Jiangxia District	Wuhan Nanshan Elderly Care Co., Ltd., Longquan Hui Branch	Wulongquan Mine Hospital, Wulongquan Subdistrict, Jiangxia District	114.324	30.2692
163	Jiangxia District	Yijia Elderly Care Institution, Miaoshan Community, Jiangxia District	No. 10, Sunshine Avenue, Jiangxia District	114.37	30.4091
164	Qiaokou District	Social Welfare Institution, Qiaokou District	No. 6 Gongnong Road, Yijia Subdistrict, Qiaokou District	114.171	30.6188
165	Qiaokou District	Renshou Elderly Care Institution, Qiaokou District	No. 359, Renshou Road, 2nd Floor, Qiaokou District	114.257	30.5791
166	Qiaokou District	Xinxin Nursing Home, Qiaokou District	No. 251, Xiaojiadun, Gutian Street, Qiaokou District	114.197	30.599
167	Qiaokou District	Yingbei Community Elderly Care Institution, Qiaokou District	No. 75, Yingfang North Village, Hanshuiqiao Street, Qiaokou District	114.253	30.5916
168	Qiaokou District	Changfeng Furong Elderly Care Institution, Qiaokou District	No. 7-1, Gutian Second Road, Gutian Street, Qiaokou District	114.198	30.5947
169	Qiaokou District	Xingfu Elderly Care Institution, Qiaokou District	No. 31-4, Hongxing Xincun, Shenghuo Village, Gutian Second Road, Gutian Street, Qiaokou District	114.198	30.5962
170	Qiaokou District	Fengzhuyuan Community Elderly Care Institution, Qiaokou District	No. 456, Building D, Changmatou, Changfeng Street, Qiaokou District	114.243	30.6139
171	Qiaokou District	Hanxing Sunshine Elderly Care Institution, Jiefang Community, Qiaokou District	No. 911, Jiefang Avenue, Hanshuiqiao Street, Qiaokou District	114.255	30.5828
172	Qiaokou District	Xinhua Community Elderly Care Institution, Qiaokou District	No. 149, Jiefang Avenue, Qiaokou District	114.215	30.5999
173	Qiaokou District	Kangyuan Elderly Care Institution, Xinglong Community, Qiaokou District	No. 68, Hanzhong West Road, Hanzhong Street, Qiaokou District	114.261	30.573
174	Qiaokou District	Qiaokou District Jianle Community Elderly Care Institution.	No. 12, Jianle Village, Ronghua Street, Qiaokou District	114.26	30.5778
175	Qiaokou District	Qiaokou District Rongdong Community Fumu Village Elderly Care Institution.	No. 4, Ronghua East Village, Liujiaoting Street, Qiaokou District	114.276	30.5792
176	Qiaokou District	Qiaokou District Haigong Community Elderly Care Institution.	No. 198, Jianshe Avenue, Hanshuiqiao Street, Qiaokou District	114.251	30.5918
177	Qiaokou District	Qiaokou District Rongdong Community Minghui Elderly Care Institution.	No. 50-51, Ronghua East Village, Liujiaoting Street, Qiaokou District	114.277	30.5784
178	Qiaokou District	Qiaokou District Jianyi Community Taoyuan Elderly Care Institution.	No. 19, Jiayi Xincun, Hanjia Dun Street, Qiaokou District	114.225	30.59
179	Qiaokou District	Qiaokou District Fazhan Community Elderly Care Institution.	No. 98, Fazhan First Village, Zongguan Street, Qiaokou District	114.233	30.6049
180	Qiaokou District	Qiaokou District Changma Community Jian’an Elderly Care Institution.	No. 97, Changma Community, Fazhan Third Village, Changfeng Street, Qiaokou District	114.236	30.6131
181	Qiaokou District	Zhengkang Community Elderly Care Institution, Qiaokou District	No. 5, Changtian Road, Nanniwan Avenue, Changfeng Street, Qiaokou District	114.204	30.6105
182	Qiaokou District	Tiannian Elderly Care Institution, Zhengkang Community, Qiaokou District	No. 1, Fuyi, Gutian Third Road, Gutian Street, Qiaokou District	114.209	30.6112
183	Qiaokou District	Fengmei Community Elderly Care Institution, Qiaokou District	No. 175, Building B5, South District, Huasheng Hankou City Square, Fengmei Road, Qiaokou District	114.213	30.6216
184	Qiaokou District	Rongji Gutian Elderly Apartment, Qiaokou District	No. 12, Changsheng Road, Gutian Second Road, Qiaokou District	114.205	30.6116
185	Qiaokou District	Hanzhong Community Elderly Care Institution, Qiaokou District	No. 3, Huashanli, Hanzhong Road, Qiaokou District	114.273	30.573
186	Qiaokou District	Comprehensive Elderly Care Service Center, Hanjia Dun Street, Qiaokou District	No. 57, Jiayi Road, No. 3, Qiaokou District	114.225	30.589
187	Qiaokou District	Qiaokou District Yijia Street Comprehensive Elderly Care Service Center	Building 4, Phase 1, District 4, Huasheng City Square, Dongfeng Village, Changfeng Street, Qiaokou District	114.191	30.6334
188	Qingshan District	Qingshan District Social Welfare Institution, Wuhan	No. 1 Kangshou Road, Baiyushan, Qingshan District	114.491	30.6139
189	Qingshan District	Bajifu Street Rural Welfare Institution, Qingshan (Chemical) District	Green Road, Jianshe Village (300 meters northwest of Wanyue Middle School, Wuhan)	114.485	30.6539
190	Qingshan District	Yixin Community Elderly Care Institution, Qingshan District	118 Community, Ganghua Village Street, Qingshan District	114.388	30.6255
191	Qingshan District	Wuhan Nanshan Elderly Care Co., Ltd. First Branch	No. 11, Suiyang Street, No. 56, Qingshan District	114.416	30.63
192	Qingshan District	Jun’an Community Elderly Care Institution, Qingshan District	Thirtymen, Baiyushan Fourth Street, Qingshan District	114.487	30.6158
193	Qingshan District	Qingshan District Yijiangyuan Community Elderly Care Institution	1st-3rd Floor, Block F, Yijiang Yuan, Aoshang Century City, Qingshan District	114.365	30.6271
194	Qingshan District	Qingshan District Puren Bailing Community Rehabilitation Institution	No. 9, Wudong Road, Qingshan District	114.466	30.5844
195	Qingshan District	Qingshan District Chuan Factory Community Elderly Care Institution	No. 11, Changyang Road, Qingshan District	114.443	30.661
196	Qingshan District	Qingshan District(Chemical Industry District)Xianleju Community Elderly Care Institution	Building 21, Liming Village, Bajixinfu, Baiyushan, Qingshan District	114.497	30.6107
197	Wuchang District	Wuchang District Social Welfare Institution	No. 109, Liangdao Street	114.312	30.5539
198	Wuchang District	Wuchang District Hubeixiang Community Ruifuan Elderly Care Institution	No. 23, Minzhu Road	114.303	30.5535
199	Wuchang District	Wuchang District Xudong Community Family Elderly Care Institution	Building 1, Zhuyuan, Tuanjie Mingju, Hongxiang Road	114.351	30.59
200	Wuchang District	Shunhong Elderly Care Institution, Erqiao Community, Wuchang District	Building 45, Xudong Community	114.351	30.5979
201	Wuchang District	Wuche Elderly Care Institution, Zhaojiadun Community, Wuchang District	No. Te1, Wuche Village, Qiaokou District	114.333	30.5872
202	Wuchang District	Minkan Elderly Care Institution, Yanzhi Road Community, Wuchang District	No. 109, Liangdao Street	114.312	30.5539
203	Wuchang District	Tongxinyuan Elderly Care Institution, Fuxing Road Community, Wuchang District	No. 222, Zhangzhidong Road (inside Ziyang Lake Park)	114.314	30.5383
204	Wuchang District	Fuxing Elderly Care Institution, Baowangdi Community, Wuchang District	No. 7, Xunsihe Street	114.304	30.5329
205	Wuchang District	Ankang Elderly Care Institution, Shuilu Community, Wuchang District	No. 18, Shuilu Street	114.305	30.5367
206	Wuchang District	Kangfu Elderly Care Institution, Bapu Street Community, Wuchang District	No. 165, Xinqiao Street	114.306	30.5312
207	Wuchang District	Wuchang District Youdian Community Xiangyang Elderly Care Institution	No. 294, Lujia Street	114.309	30.5227
208	Wuchang District	Wuchang District Shaihu Community Aixin Elderly Care Institution	No. Te1, Tianhua Xincun	114.33	30.5238
209	Wuchang District	Wuchang District Baiyun Community Kangleyuan Elderly Care Institution	No. 589, Baiyun First Road, Shidong Street	114.297	30.3434
210	Wuchang District	Wuchang District Yanzhi Road Community Baitutang Elderly Care Institution	No. 235, Liangdao Street	114.312	30.5537
211	Wuchang District	Wuchang District Luojia Mountain Street Community Elderly Care Institution	No. 463, Bayi Road	114.379	30.5352
212	Wuchang District	Wuchang District Fangqi Community Antai Elderly Care Institution	No. Te1, Tiejilu Road	114.354	30.6124
213	Wuchang District	Wuchang District Ningsong Community Chudu Elderly Care Institution	No. 369, Pingan Road, Nanhu Garden	114.325	30.5221
214	Wuchang District	Wuchang District Chucai Community Kangshou Elderly Care Institution	No. 37, Qinglong Alley	114.307	30.5526
215	Wuchang District	Wuchang District Wanfulin Community Huyou Elderly Care Institution	No. 525, Baishazhou Avenue	114.307	30.523
216	Wuchang District	Wuchang District Didong Community Zhongtai Elderly Care Institution	No. 1, Zhongtai Garden, Jiangmin Road	114.299	30.5207
217	Wuchang District	Wuchang District Jiefangqiao Community Kangjian Elderly Care Institution	No. Te1, Glass Tang, Jiefang Bridge, Qidu Dormitory	114.3	30.5297
218	Wuchang District	Wuchang District Tuanjie Community Yueshan Elderly Care Institution	Building 23, No. 992, Tuanjie Avenue, Wuchang District	114.355	30.5876
219	Wuchang District	Wuchang District Wuche Fourth Village Community Yiyang Tianxiang Elderly Care Institution	No. 501, Heping Avenue, Sanjiao Garden, Sanjiao Road Community, Wuchang District	114.325	30.5802
220	Xinzhou District	Xinzhou District Xiyanghong Elderly Care Institution	No. 175, Renfang Road, Zhucheng Street, Xinzhou District	114.802	30.8276
221	Xinzhou District	Zhucheng Subdistrict Rural Welfare Institution, Xinzhou District.	Chenghu Village, Zhucheng Subdistrict.	114.778	30.8433
222	Xinzhou District	Yangluo Subdistrict Rural Welfare Institution, Xinzhou District.	Jintai Village, Yangluo Subdistrict.	114.653	30.6733
223	Xinzhou District	Yueming Branch, Yangluo Subdistrict Rural Welfare Institution, Xinzhou District.	Yueming Village, Yangluo Subdistrict.	114.653	30.6733
224	Xinzhou District	Cangbu Subdistrict Rural Welfare Institution, Xinzhou District.	Zhoupou Village, Cangbu Subdistrict.	114.623	30.7953
225	Xinzhou District	Fangyang Branch, Cangbu Subdistrict Rural Welfare Institution, Xinzhou District.	Fangyang Village, Cangbu Subdistrict.	114.651	30.9025
226	Xinzhou District	Jiujie Subdistrict Rural Welfare Institution, Xinzhou District.	Jiugang Village, Jiujie Subdistrict.	114.944	30.8518
227	Xinzhou District	Xinzhou District Jiujie Subdistrict Rural Welfare Institution, Jianglin Branch	Duanshan Village, Jiujie Subdistrict	114.885	30.8149
228	Xinzhou District	Xinzhou District Sandian Subdistrict Rural Welfare Institution	Gaofu Village, Sandian Subdistrict	114.853	30.9257
229	Xinzhou District	Xinzhou District Liji Subdistrict Rural Welfare Institution	Lizhen Village, Liji Subdistrict	114.696	30.8776
230	Xinzhou District	Xinzhou District Liji Subdistrict Rural Welfare Institution, Zhangdian Branch	No. 100, Zhangdian Zhengjie, Liji Street	114.75	30.8577
231	Xinzhou District	Xinzhou District Wangji Subdistrict Rural Welfare Institution, Kongbu Branch	No. 3 Kongbu Main Street, Wangji Subdistrict	114.692	30.7673
232	Xinzhou District	Xinzhou District Shuangliu Subdistrict Rural Welfare Institution	No. 105 Liuzhen Street, Shuangliu Subdistrict	114.655	30.5959
233	Xinzhou District	Xinzhou District Pantang Subdistrict Rural Welfare Institution	Xizheng Village, Pantang Street	114.895	30.9905
234	Xinzhou District	Rural Welfare Institution, Xugu Street, Xinzhou District	No. 17, Gongxin Street, Xugu Town	114.981	30.9511
235	Xinzhou District	Rural Welfare Institution, Fenghuang Town, Xinzhou District	Maochong Village, Fenghuang Town	114.733	30.9437
236	Xinzhou District	Liulin Branch, Rural Welfare Institution, Xinchong Street, Xinzhou District	No. 50, Liulinxia Street, Xinchong Town	114.886	30.8345
237	Xinzhou District	Xingguang Elderly Care Institution, Liuji Community, Xinzhou District	Chengyili, Chenghu Village, Zhucheng Street, Xinzhou District	114.772	30.8378
238	Xinzhou District	Zhudian Elderly Care Institution, Jun’an Community, Xinzhou District	Zhudian Village, Yangluo Street, Xinzhou District	114.637	30.6406
239	Xinzhou District	Jinxiu Jiayuan Elderly Care Institution, Rongsheng Community, Xinzhou District	Group 8, Weijui Village, Wangji Subdistrict	114.686	30.7609
240	Xinzhou District	Cihang Elderly Care Institution, Mujiajing Community, Xinzhou District	Former "May Seventh Cadre School", Zhucheng Street, Xinzhou District	114.778	30.7514
241	Xinzhou District	Xinzhou Rensheng Elderly Residence	No. 111, Pingjiang Avenue, Yangluo Street	114.573	30.663
242	Xinzhou District	Tongda Elderly Care Institution, Shangdong Community, Xinzhou District	No. 168, Shangdong Community, Yangluo Street	114.576	30.6658
243	Xinzhou District	Elderly Care Institution, Xinjian Community, Xinzhou District	No. 97, Xinzhou Avenue, Zhucheng Street, Xinzhou District	114.805	30.85
244	Xinzhou District	Elderly Care Institution, Wenhua Road Community, Xinzhou District	No. 92, Qilong Street, Cangbu Street	114.606	30.8396
245	Xinzhou District	Liuhu Elderly Care Institution, Xinchong Community, Xinzhou District	Original Hu Ren Campus of Central Primary School, Xinchong Street	114.821	30.7961
